# Supplementary material
Source: Springer Nature journal article supplement (https://www.springermedizin.de/resource/supplementary/12936_2013_3705_MOESM2_ESM.pdf/9546346)

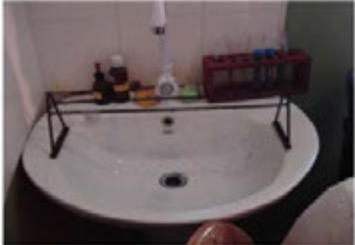

a

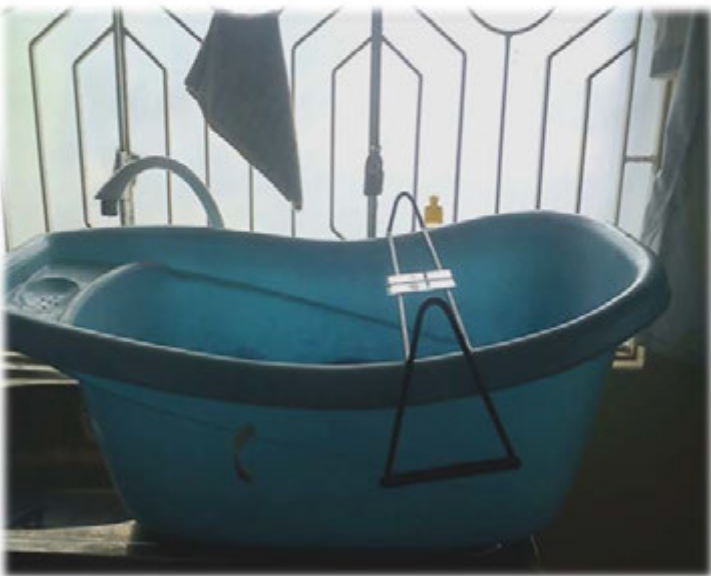

b

Supplement: MOESM2 [file 9546346]
